# Supplementary material for: Trends in gaseous pollutant emissions and their effects on lung cancer incidence: an analysis using mixed-effects models and the difference-in- differences approach
Source: Research Square preprint supplement (doi:10.21203/rs.3.rs-7219588/v1), 2025-08-01
Supplement: Supplementary file 1 [file 949117f99cf4e04148a21c5d.docx]

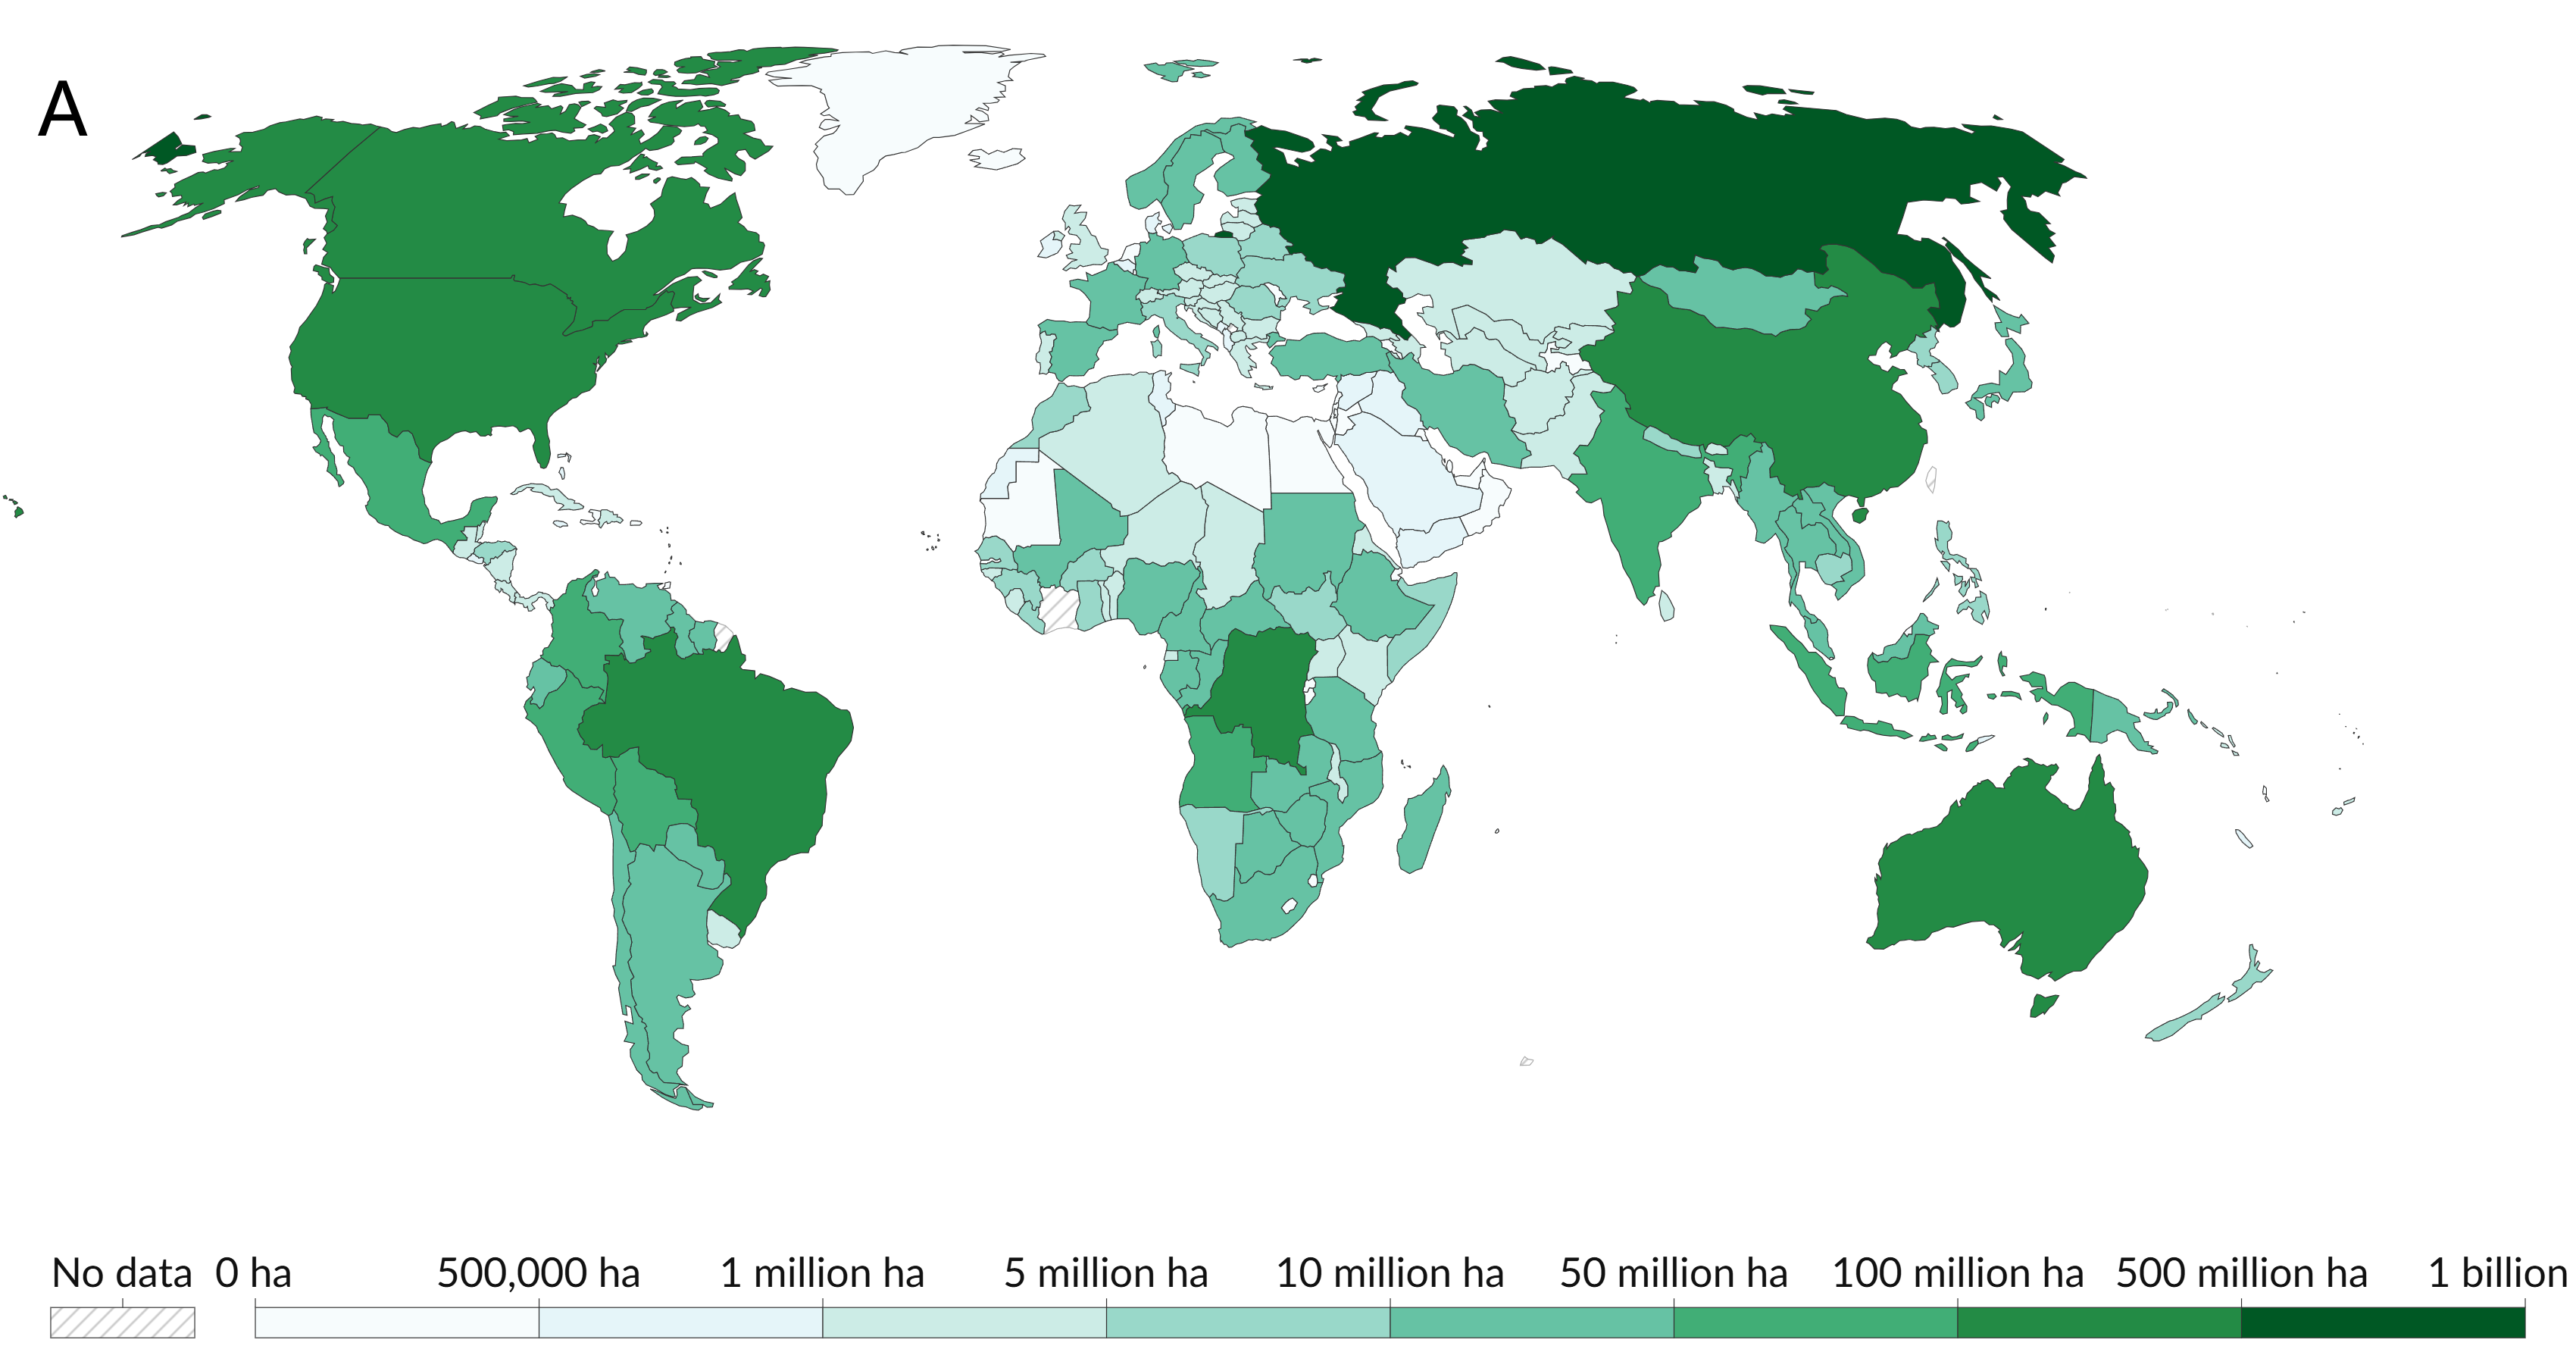

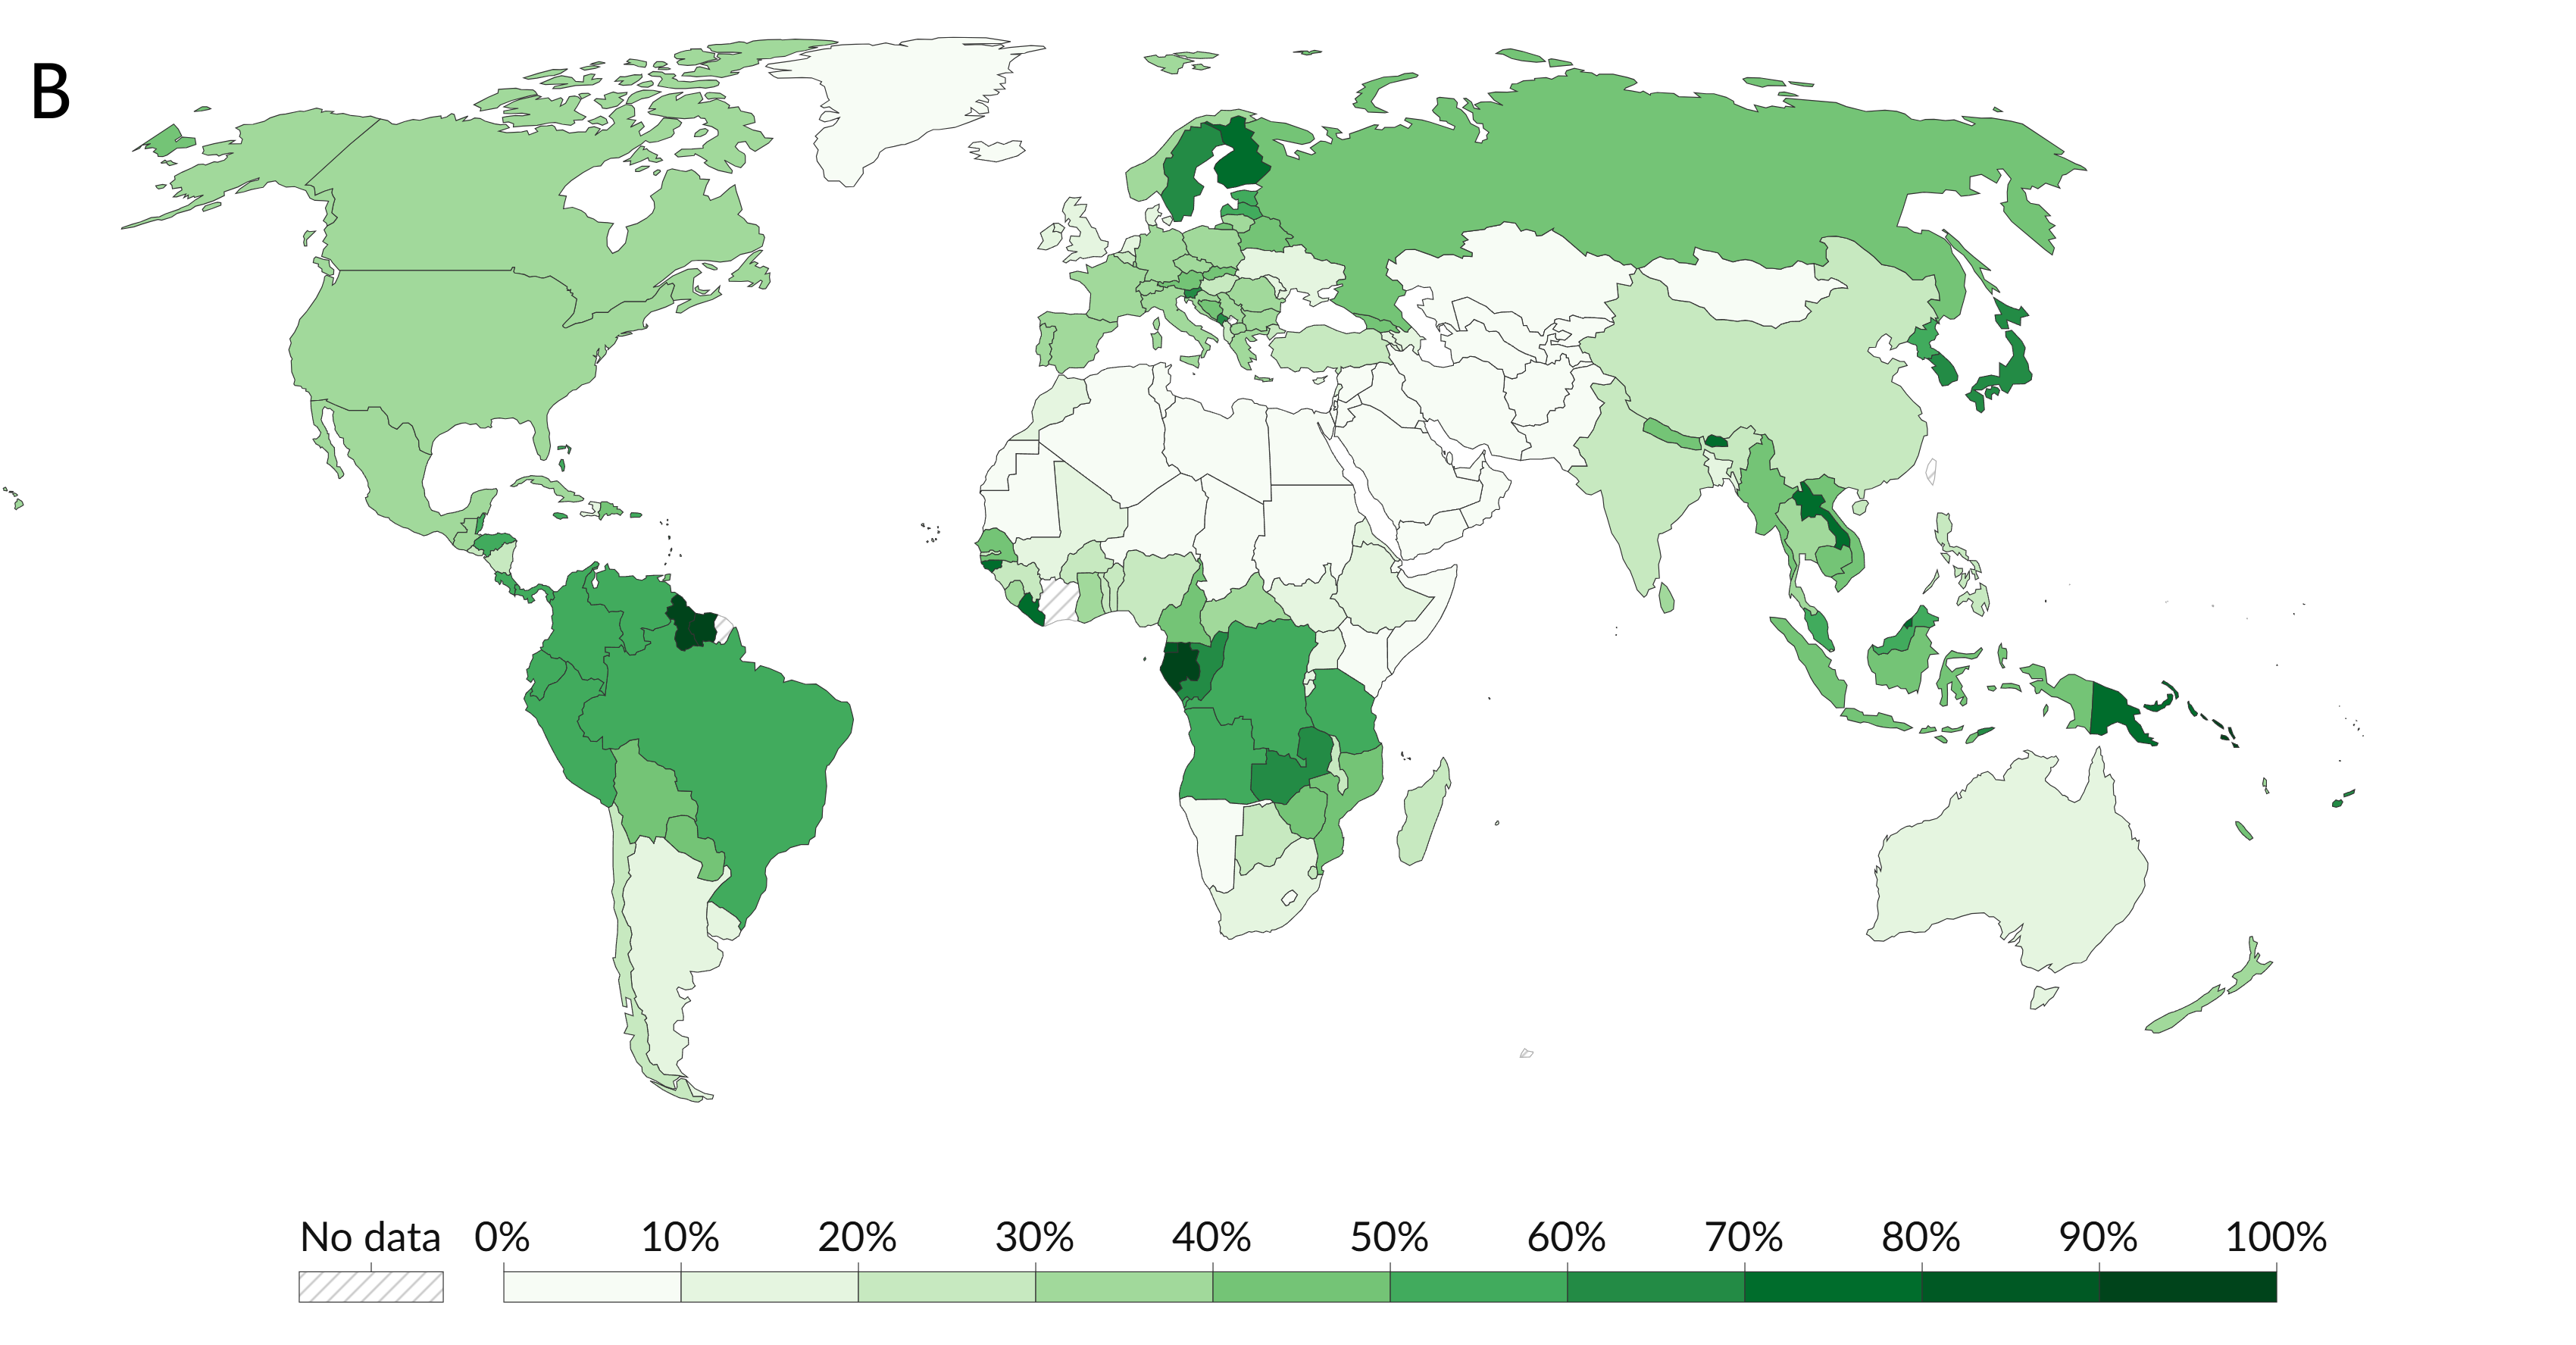

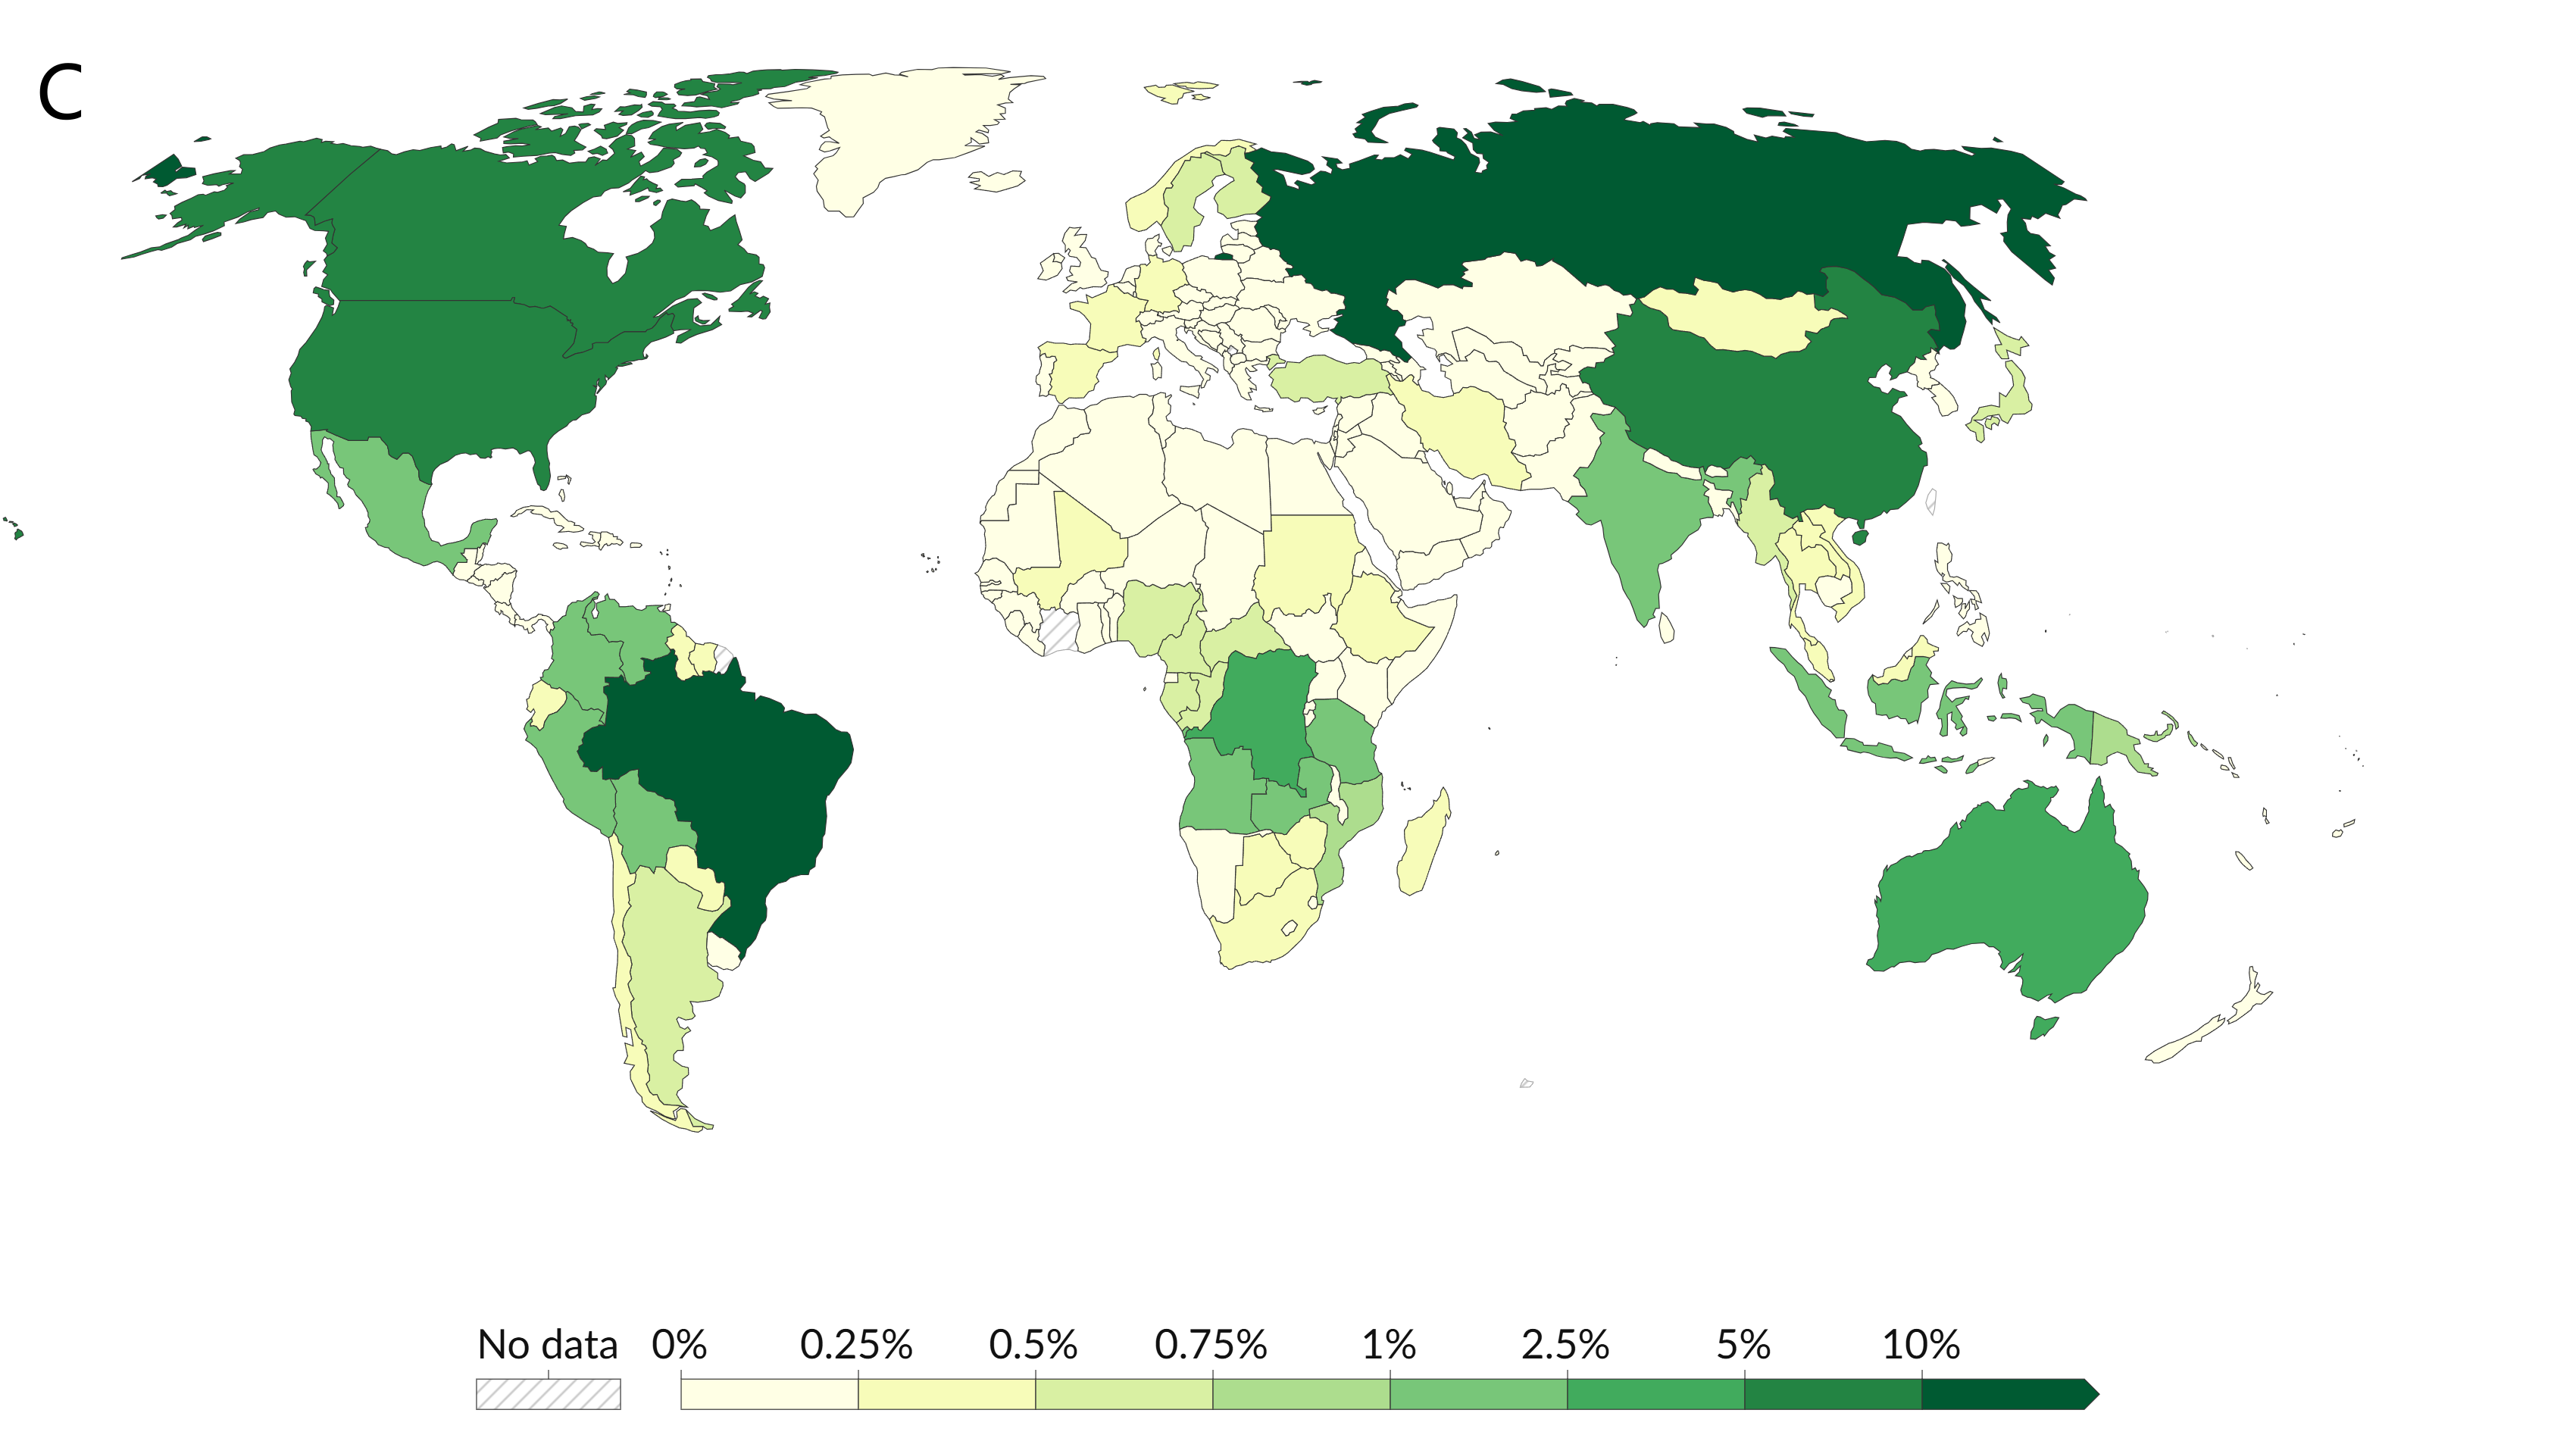


**Supplemental Figure S1. World map of forest area (A), forest cover percent (B), and share of global forest area (C) in 2020.**


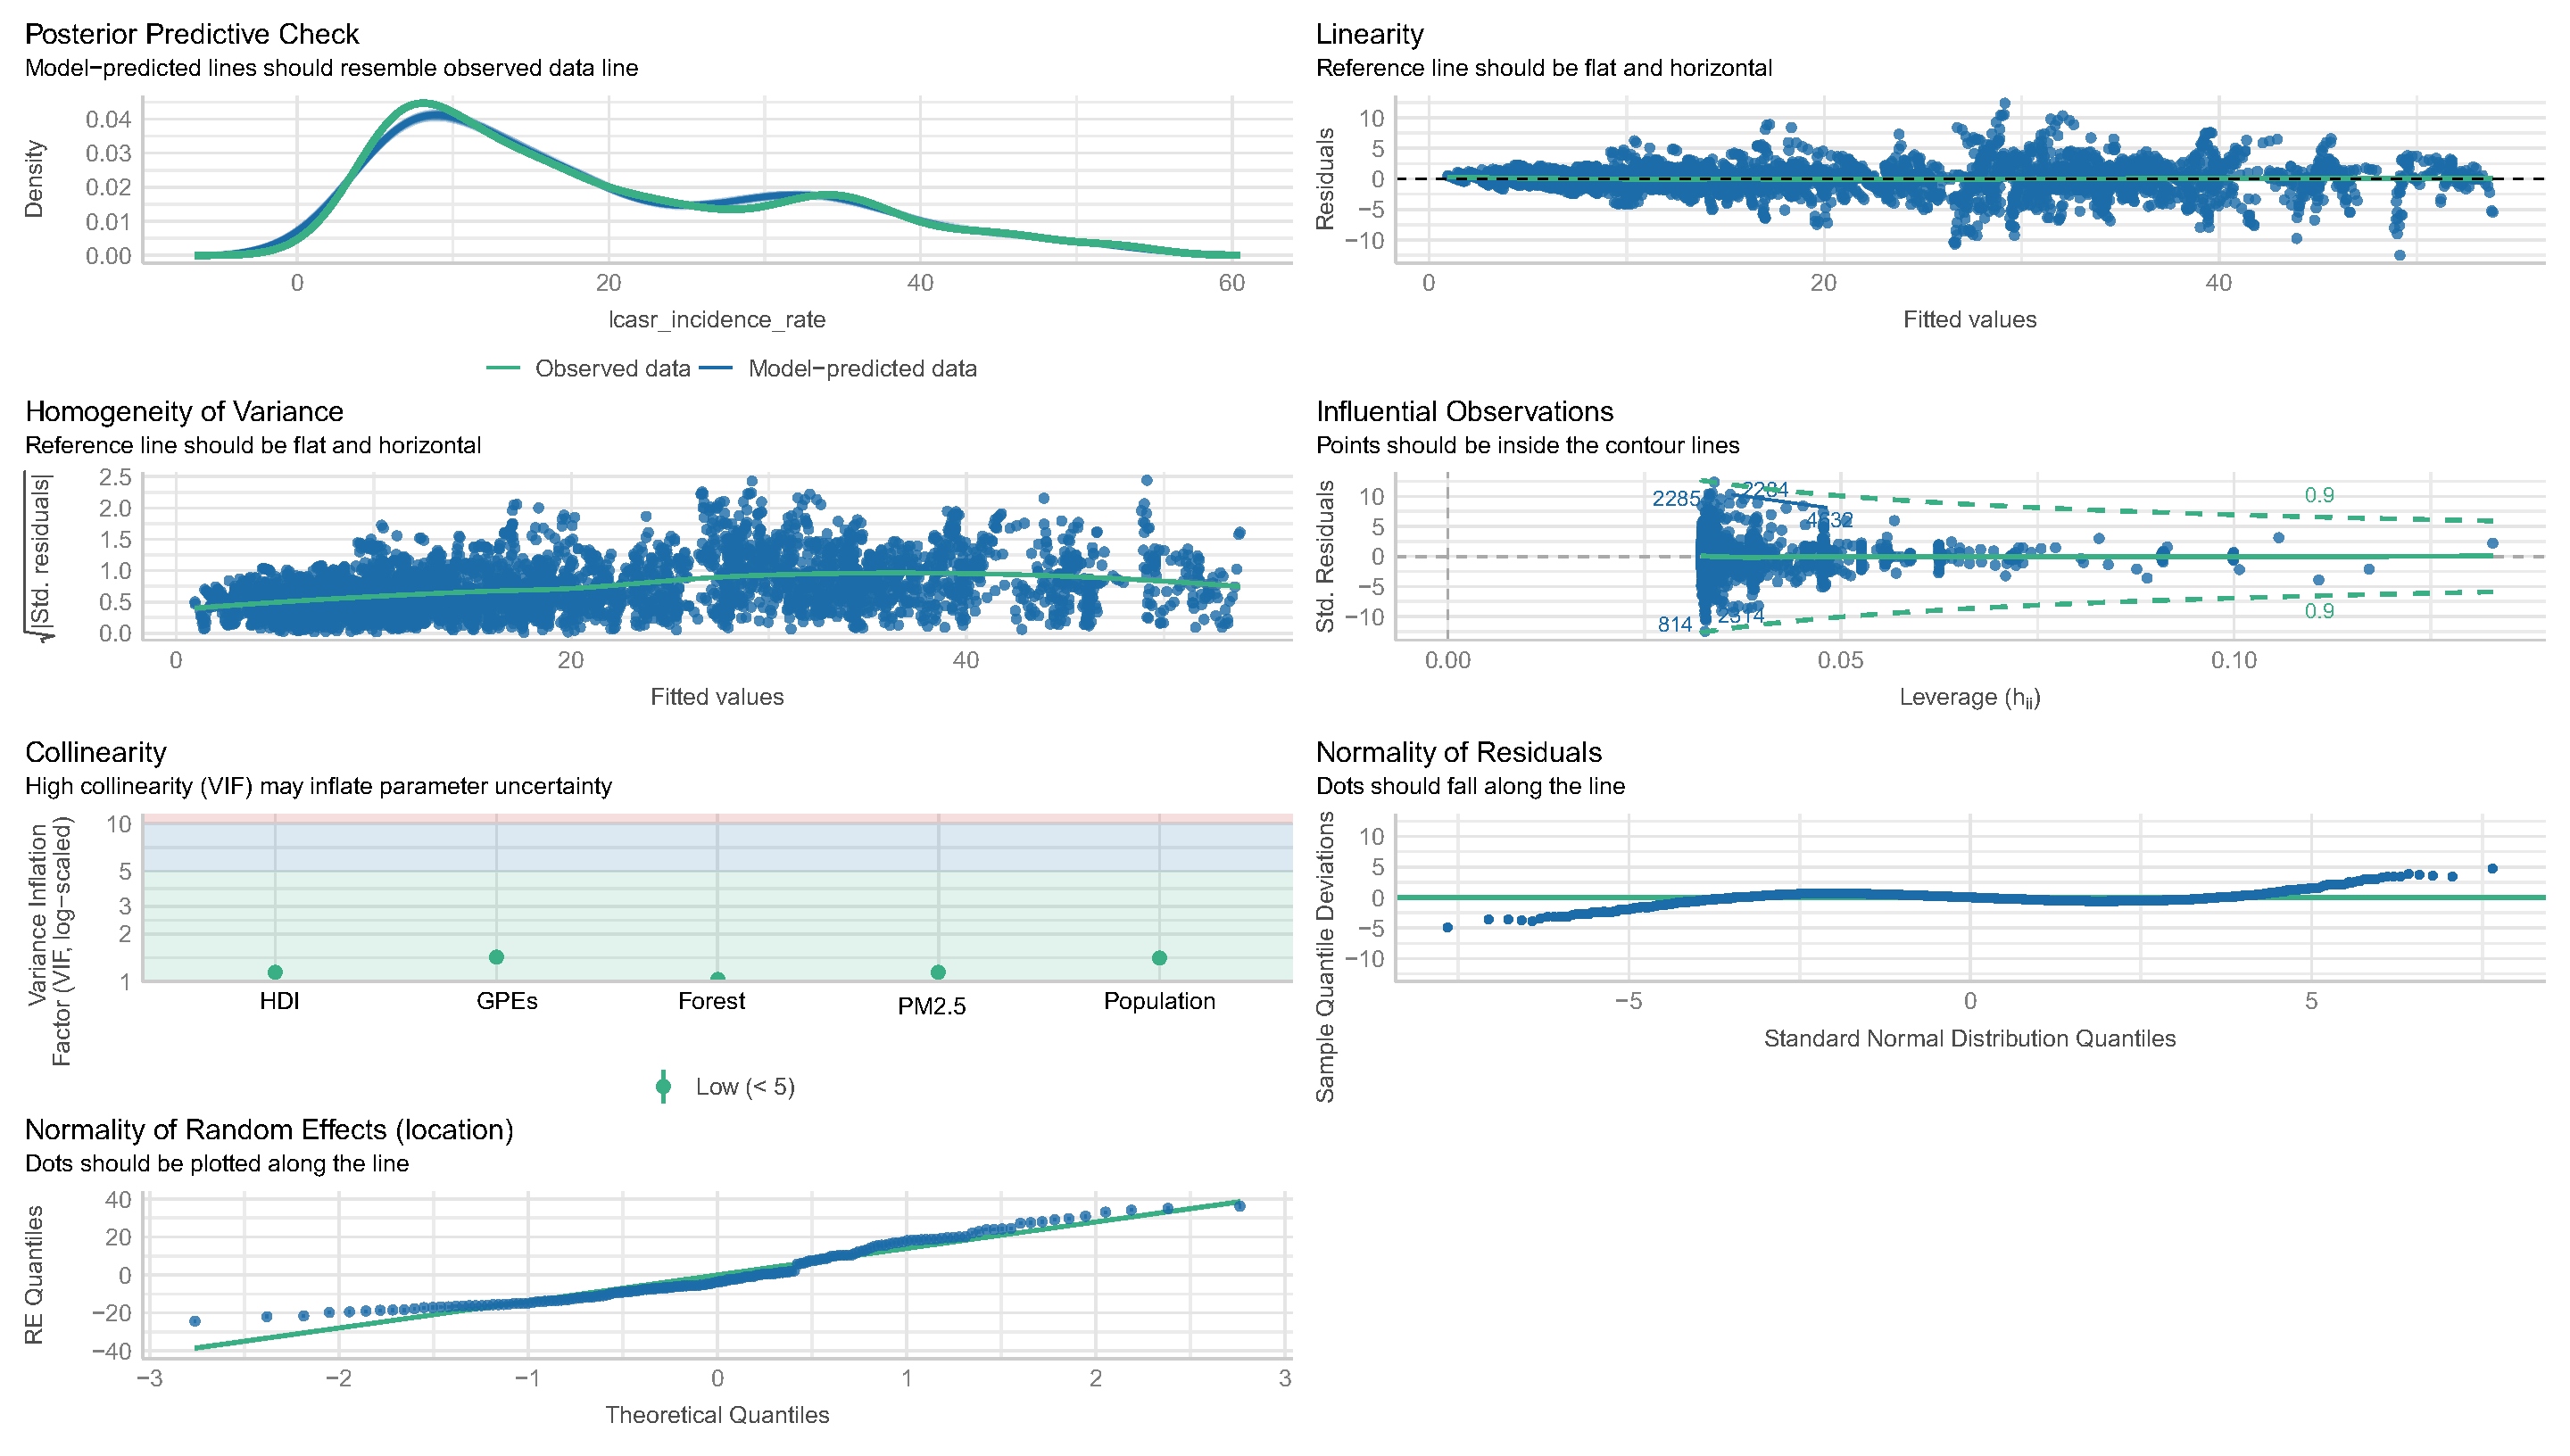


**Supplemental Figure S2. Mixed-effects model evaluation.**


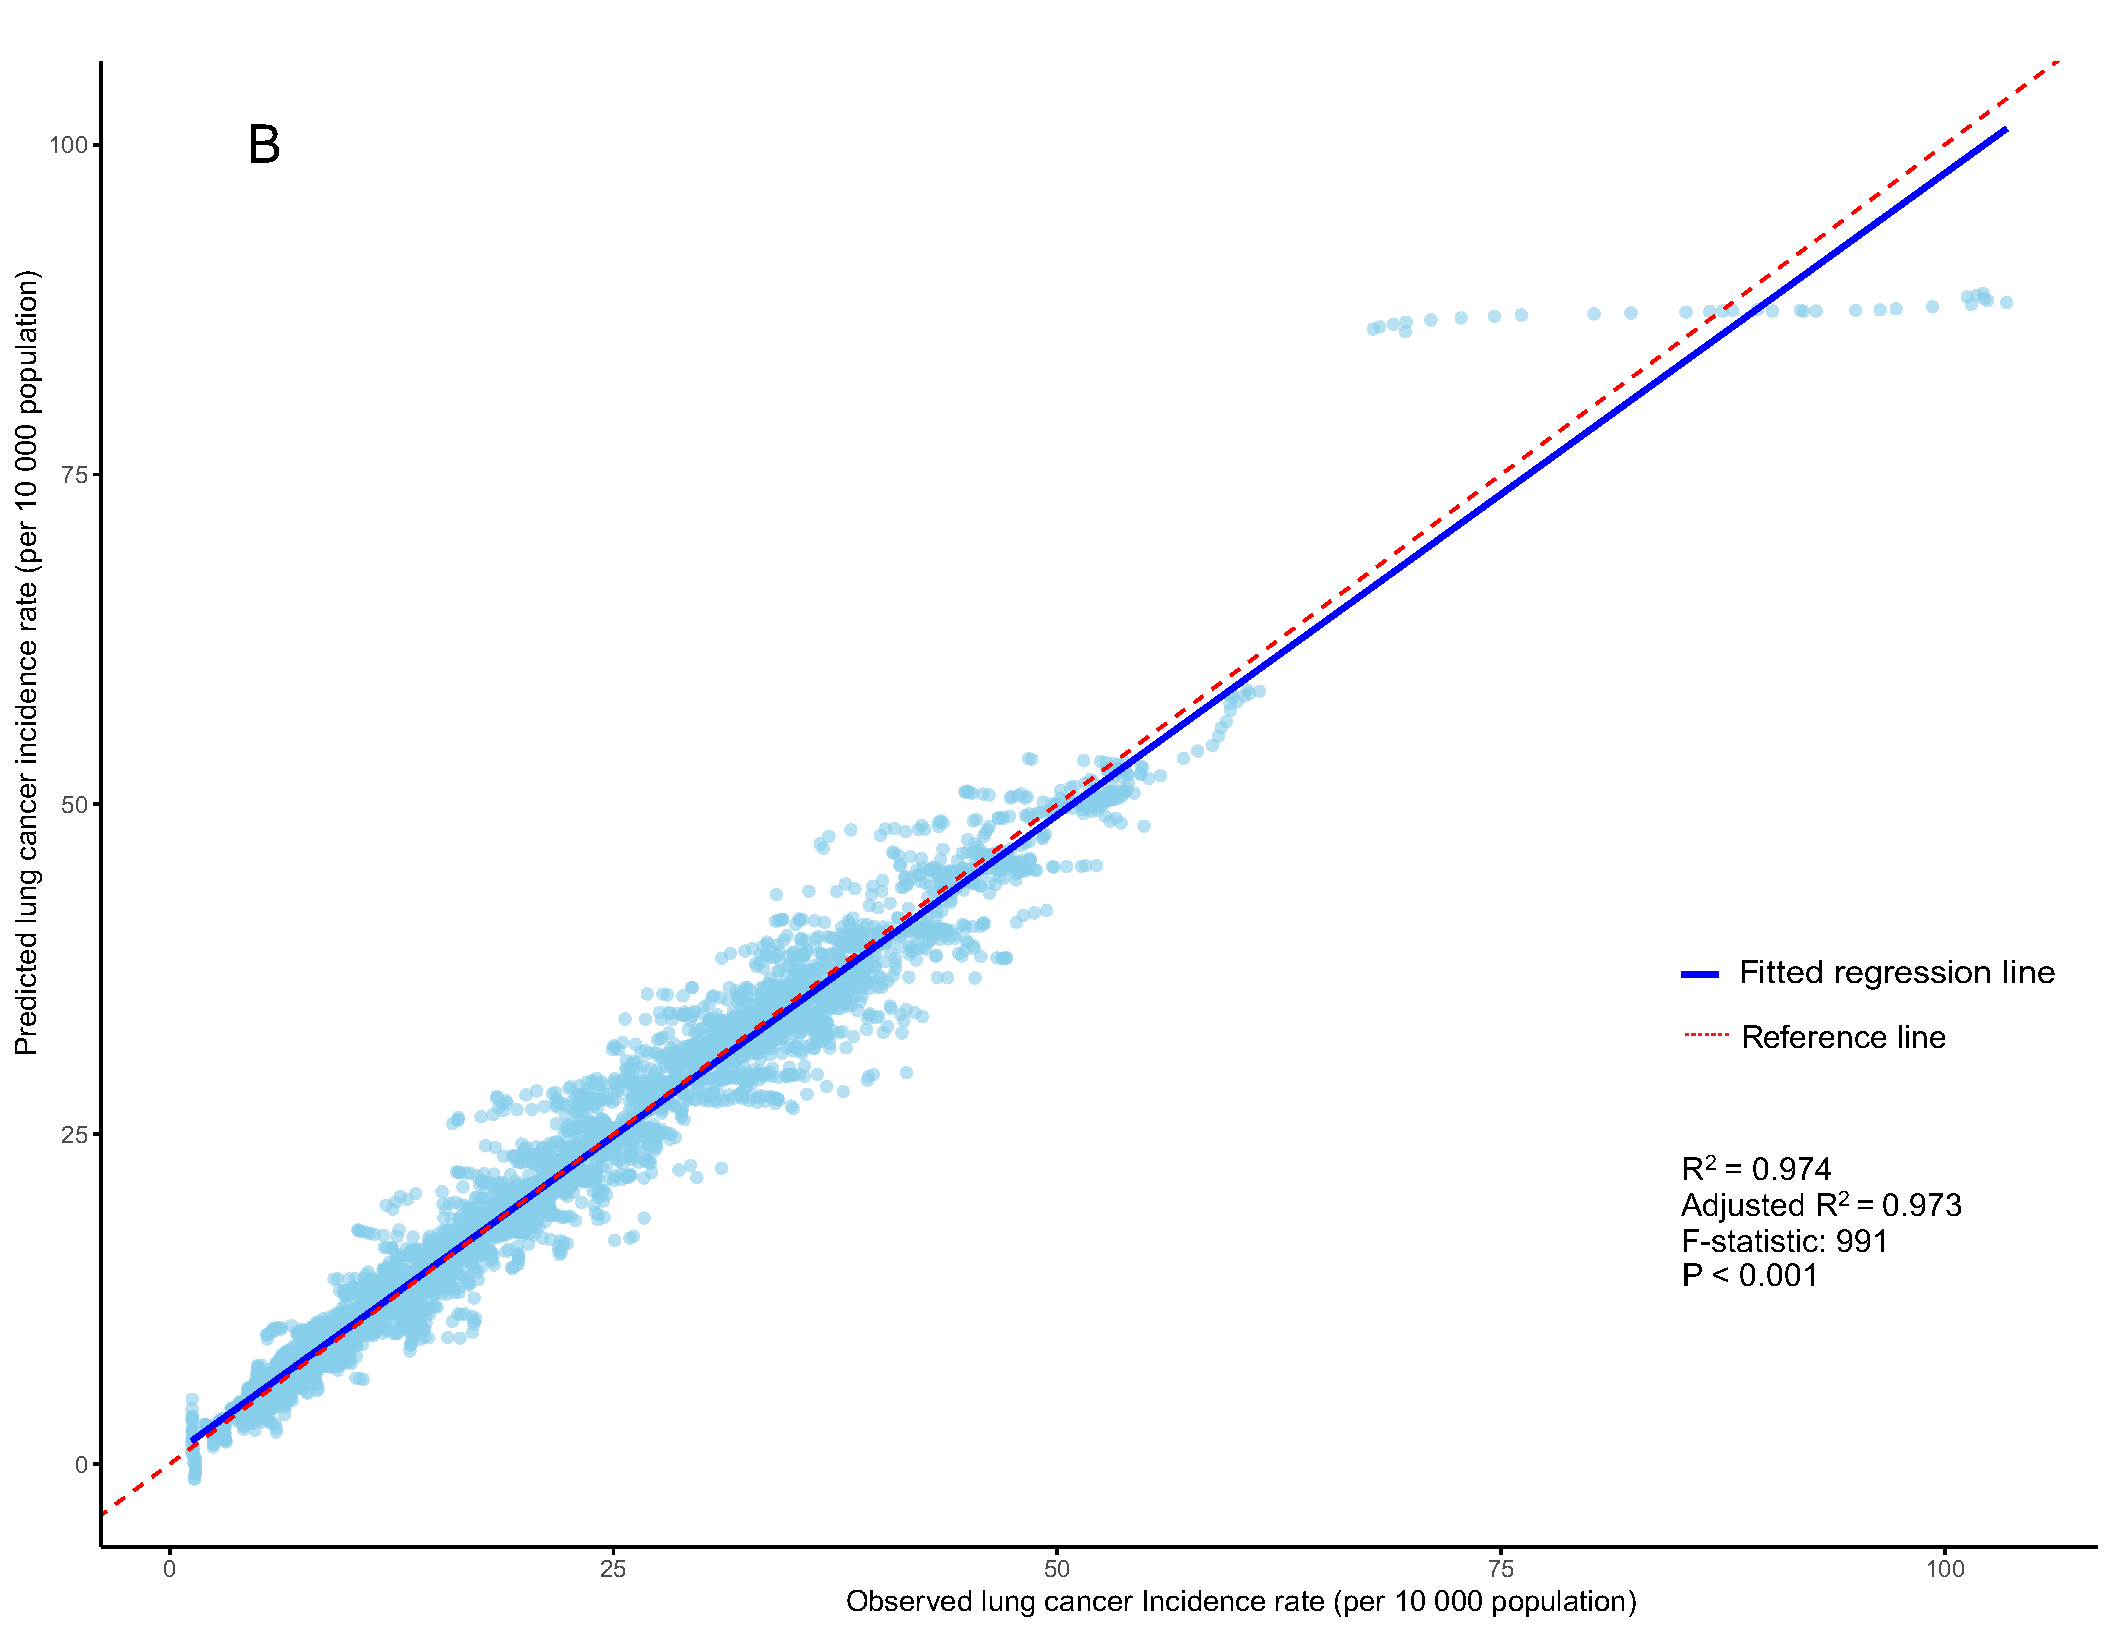


**Supplemental Figure S3. Difference-in-differences approach model evaluation.**
