# Supplementary material for: Trends in gaseous pollutant emissions and their effects on lung cancer incidence: an analysis using mixed-effects models and the difference-in- differences approach
Source: Research Square preprint supplement (doi:10.21203/rs.3.rs-7219588/v1), 2025-08-01
Supplement: Supplementary file 2 [file da56698407e0ed406d8a8f3b.docx]

| **Table S1. List of international classification of diseases codes mapped to global burden of disease cause list for tracheal bronchus, and lung cancer in incidence and mortality** | | | |
| --- | --- | --- | --- |
| **Cause** | | **ICD-10** | **ICD-9** |
| Tracheal, bronchus, and lung cancer | Incidence | C33, C34–C34.92, Z12.2, Z80.1–Z80.2, Z85.1–Z85.20 | 162–162.9, 209.21, V10.1–V10.20, V16.1–V16.2, V16.4–V16.40 |

| **Table S2. Gaseous pollution emissions thresholds defined in different ways** | | | |
| --- | --- | --- | --- |
|  | Mean values of all (kilotons) | Mean values of high-HDI (kilotons) | Mean values, after excluding extreme levels (ie,1st or above the 99th percentiles) (kilotons) | |
| Gaseous pollution emissions | 143674.69 | 226889.97 | 143325.43 | |
| Nitrous Oxide (N₂O) | 43.50 | 53.69 | 43.49 | |
| Nitrogen Oxides (NOₓ) | 501.27 | 698.25 | 503.96 | |
| Organic Carbon (OC) | 28.81 | 22.89 | 28.89 | |
| Black Carbon (BC) | 28.81 | 22.89 | 28.89 | |
| Sulfur Dioxide (SO₂) | 491.96 | 612.69 | 494.10 | |
| Non-Methane Volatile Organic Compounds (NMVOC) | 640.19 | 698.41 | 641.68 | |
| Ammonia (NH₃) | 271.72 | 249.54 | 271.40 | |
| Carbon Dioxide (CO₂) | 137328.38 | 220179.55 | 136954.99 | |
| Carbon Monoxide (CO) | 2717.42 | 2493.28 | 2735.37 | |
| Methane (CH₄) | 1622.63 | 1858.77 | 1622.65 | |

| **Table S3. Attributable fraction in different threshold of gaseous pollution emissions** | | | | | | | |
| --- | --- | --- | --- | --- | --- | --- | --- |
|  |  | | Attributable fraction, % (95%CI) | | |  | |
|  | | **The threshold in mean values of high-HDI** | | **P value** | **The threshold in mean values**, after excluding extreme levels (ie,1st or above the 99th percentiles) | | **P value** |
| Total gaseous pollution emissions | | 4.39% (3.25-5.53) | | **<0.001** | 6.99% (5.94-8.05) | | **<0.01** |
| Nitrous Oxide (N₂O) | | 4.03% (3.10-4.96) | | **<0.001** | 5.20% (4.20-6.21) | | **<0.01** |
| Nitrogen Oxides (NOₓ) | | 7.59% (3.87-11.30) | | **<0.001** | 7.10% (6.0-8.0) | | **<0.01** |
| Organic Carbon (OC) | | 3.53% (2.79-4.28) | | **<0.001** | 4.80% (4.0-5.53) | | **<0.01** |
| Black Carbon (BC) | | 3.53% (2.79-4.28) | | **<0.001** | 4.80% (4.0-5.93) | | **<0.01** |
| Sulfur Dioxide (SO₂) | | 1.59% (0.84-2.35) | | 0.19 | 0.51% (-0.19-1.46) | | 0.2 |
| Non-Methane Volatile Organic Compounds (NMVOC) | | 7.59% (3.87-11.30) | | **<0.001** | 3.58% (2.80-4.75) | | **<0.01** |
| Ammonia (NH₃) | | 8.09% (6.60-9.58) | | **<0.001** | 5.31% (4.01-6.59) | | **<0.01** |
| Carbon Dioxide (CO₂) | | 13.70% (12.23-15.16) | | **<0.001** | 8.88% (8.11-10.79) | | **<0.01** |
| Carbon Monoxide (CO) | | 6.92% (5.60-8.23) | | **<0.001** | 6.21% (5.25-7.17) | | **<0.01** |
| Methane (CH₄) | | 19.00% (14.87-23.11) | | 0.16 | 0.75% (0.04-1.71) | | 0.37 |

| **Table S4.** Attributable fraction in different time threshold | | | | | | | |
| --- | --- | --- | --- | --- | --- | --- | --- |
|  |  | | Attributable fraction, % (95%CI) | | |  | |
|  | | **The time threshold was 2000** | | **P value** | **The time threshold was 2010** | | **P value** |
| Total gaseous pollution emissions | | 9.73% (8.62-10.85) | | **<0.001** | 9.26% (8.23-10.28) | | **<0.01** |
| Nitrous Oxide (N₂O) | | 5.34% (4.3-6.39) | | **<0.001** | 4.53% (3.55-5.5) | | **<0.01** |
| Nitrogen Oxides (NOₓ) | | 7.07% (6.08-8.06) | | **<0.001** | 6.88% (5.95-7.81) | | **<0.01** |
| Organic Carbon (OC) | | 4.82% (3.96-5.68) | | **<0.001** | 4.73% (3.94-5.51) | | **<0.01** |
| Black Carbon (BC) | | 4.82% (3.96-5.68) | | **<0.001** | 4.73% (3.94-5.51) | | **<0.01** |
| Sulfur Dioxide (SO₂) | | 0.83% (0.05-1.62) | | 0.29 | 0.06% (-0.67-0.79) | | 0.93 |
| Non-Methane Volatile Organic Compounds (NMVOC) | | 3.43% (2.52-4.35) | | **<0.001** | 3.53% (2.69-4.37) | | **<0.01** |
| Ammonia (NH₃) | | 5.27% (3.96-6.59) | | **<0.001** | 4.94% (3.67-6.21) | | **<0.01** |
| Carbon Dioxide (CO₂) | | 9.39% (8.24-10.55) | | **<0.001** | 8.81% (7.74-9.87) | | **<0.01** |
| Carbon Monoxide (CO) | | 6.08% (5.08-7.07) | | **<0.001** | 5.83% (4.91-6.75) | | **<0.01** |
| Methane (CH₄) | | 1.08% (0.18-1.97) | | 0.23 | 0.2% (-0.63-1.03) | | 0.81 |
